# Supplementary material
Source: MDPI journal article supplement (https://www.mdpi.com/2073-4395/13/8/2066)
Supplement: s1 [file s1]

Archive with 2 entries (2 files):
- Supplementary figure.pdf
- Supplementary table.pdf
