# Supplementary material
Source: MDPI journal article supplement (https://www.mdpi.com/2073-4395/13/8/2066)
Supplement: s1 [file s1]

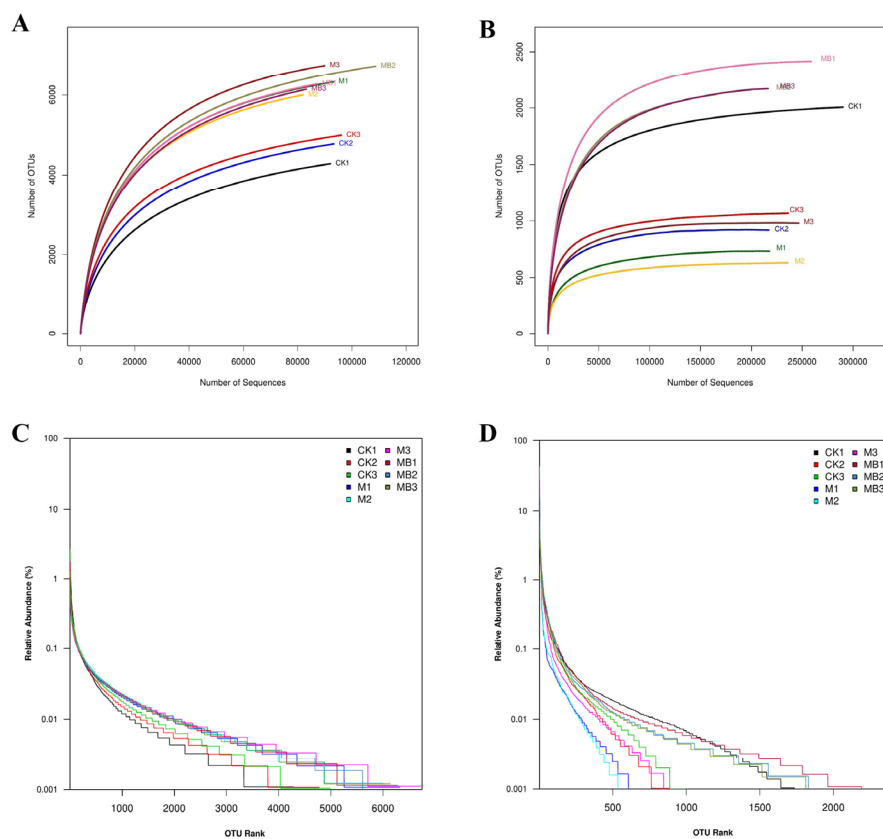

**Figure S1** Rarefaction curve (A, B) and rank abundance curve (C, D) of bacterial (A, C) and fungal (B, D) OTU of 9 soil samples

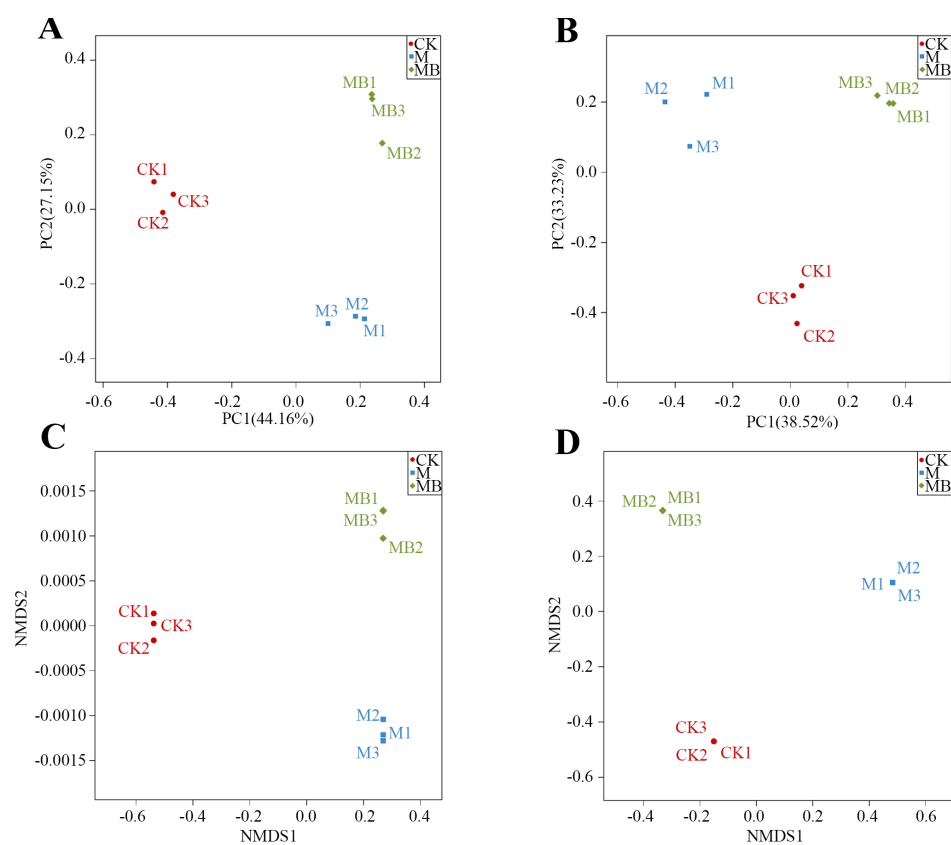

**Figure S2** Principal coordinate analysis (PCoA) (A, B) and Nonmetric multidimensional scaling analysis (NMDS) (C, D) based on Bray-Curtis for bacterial (A, C) and fungal (B, D) community composition in the five soil groups.

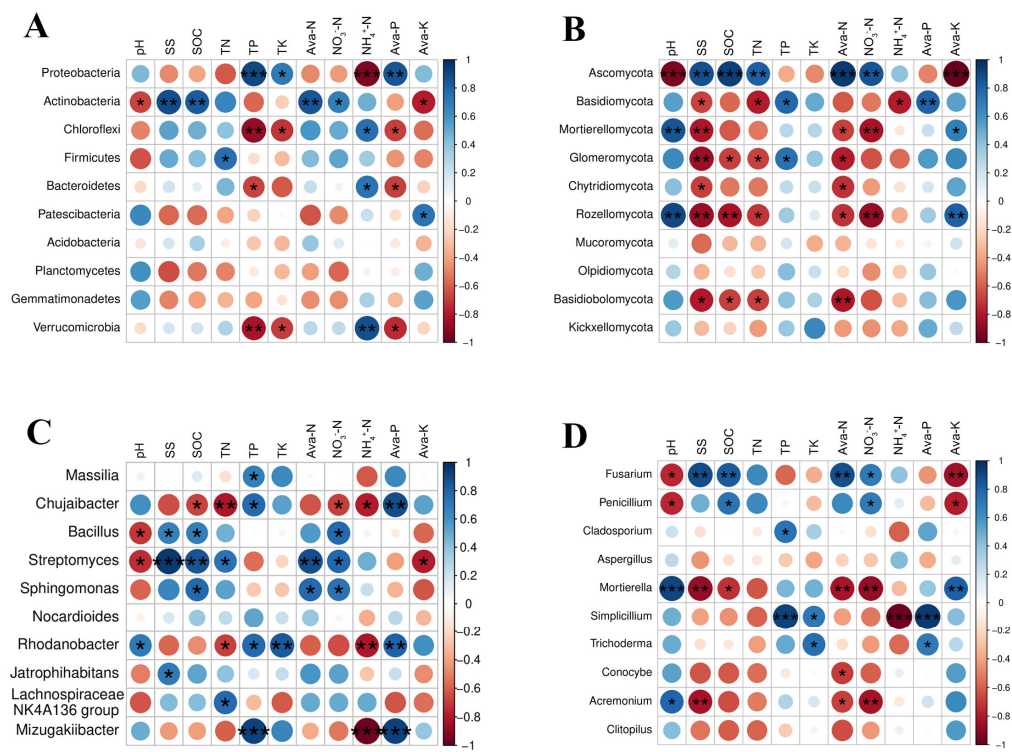

**Figure S3** Spearman's correlation analyses between the soil properties and abundance of the top 10 bacterial phyla (A), fungal phyla (B), bacterial genera (C) and fungal genera (D). The colors in the figure indicate the strength of the correlation. The closer the color is to blue, the stronger the positive correlation, while the closer the color is to red, the stronger the negative correlation. \* indicates a significant correlation (\* indicates  $P < 0.05$ ; \*\* indicates  $P < 0.01$ ; and \*\*\* indicates  $P < 0.001$ ).
