# Supplementary material
Source: MDPI journal article supplement (https://www.mdpi.com/2073-4395/13/8/2066)
Supplement: s1 [file s1 › Supplementary table.pdf]

**Table S1.** The relative abundance (%) of top 20 bacteria and fungi from the soil of three groups at the genus level

| Bacteria                       | Sample                  |                         |                         | Fungi                    | Sample                  |                          |                        |
|--------------------------------|-------------------------|-------------------------|-------------------------|--------------------------|-------------------------|--------------------------|------------------------|
|                                | CK                      | M                       | MB                      |                          | CK                      | M                        | MB                     |
| <i>Massilia</i>                | 22.95±9.05 <sup>a</sup> | 0.08±0.06 <sup>b</sup>  | 0.06±0.02 <sup>b</sup>  | <i>Fusarium</i>          | 6.06±2.35 <sup>b</sup>  | 37.31±10.30 <sup>a</sup> | 3.96±2.57 <sup>b</sup> |
| <i>Chujaibacter</i>            | 10.39±6.69 <sup>a</sup> | 0.45±0.18 <sup>b</sup>  | 4.26±0.95 <sup>ab</sup> | <i>Penicillium</i>       | 5.26±6.16 <sup>a</sup>  | 3.99±3.07 <sup>a</sup>   | 0.83±0.60 <sup>a</sup> |
| <i>Bacillus</i>                | 4.09±1.34 <sup>a</sup>  | 3.70±1.44 <sup>a</sup>  | 1.19±0.39 <sup>b</sup>  | <i>Cladosporium</i>      | 4.13±2.42 <sup>a</sup>  | 1.08±1.77 <sup>a</sup>   | 1.66±0.33 <sup>a</sup> |
| <i>Streptomyces</i>            | 1.48±0.62 <sup>b</sup>  | 5.40±1.18 <sup>a</sup>  | 0.97±0.20 <sup>b</sup>  | <i>Aspergillus</i>       | 0.91±1.21 <sup>a</sup>  | 2.55±3.80 <sup>a</sup>   | 3.02±0.55 <sup>a</sup> |
| <i>Sphingomonas</i>            | 2.35±0.64 <sup>a</sup>  | 3.42±1.88 <sup>a±</sup> | 1.65±0.39 <sup>a±</sup> | <i>Mortierella</i>       | 0.72±0.17 <sup>b</sup>  | 0.29±0.28 <sup>b</sup>   | 2.02±0.29 <sup>a</sup> |
| <i>Nocardioides</i>            | 2.41±0.45 <sup>a</sup>  | 2.03±1.11 <sup>a</sup>  | 1.42±0.15 <sup>a</sup>  | <i>Simplicillium</i>     | 2.41±1.80 <sup>a</sup>  | 0.00±0.00 <sup>b</sup>   | 0.06±0.01 <sup>b</sup> |
| <i>Rhodanobacter</i>           | 2.11±0.60 <sup>a</sup>  | 0.95±0.37 <sup>a</sup>  | 1.96±0.80 <sup>a</sup>  | <i>Trichoderma</i>       | 0.41±0.20 <sup>a</sup>  | 0.12±0.11 <sup>a</sup>   | 1.54±2.51 <sup>a</sup> |
| <i>Jatrophihabitans</i>        | 1.72±0.24 <sup>a</sup>  | 1.51±0.11 <sup>a</sup>  | 0.55±0.04 <sup>b</sup>  | <i>Conocybe</i>          | 0.03±0.06 <sup>b</sup>  | 0.04±0.03 <sup>b</sup>   | 1.54±0.57 <sup>a</sup> |
| <i>Lachnospiraceae NK4A136</i> | 0.44±0.18 <sup>a</sup>  | 1.98±1.14 <sup>a</sup>  | 1.32±1.83 <sup>a</sup>  | <i>Acremonium</i>        | 0.14±0.04 <sup>b</sup>  | 0.06±0.10 <sup>b</sup>   | 1.05±0.26 <sup>a</sup> |
| <i>Mizugakiibacter</i>         | 2.12±0.42 <sup>a</sup>  | 0.18±0.11 <sup>c</sup>  | 1.21±0.13 <sup>b</sup>  | <i>Clitopilus</i>        | 0.01±0.02 <sup>a</sup>  | 0.16±0.26 <sup>a</sup>   | 1.00±1.01 <sup>a</sup> |
| <i>Luteibacter</i>             | 0.02±0.02 <sup>b</sup>  | 0.14±0.09 <sup>b</sup>  | 2.49±0.42 <sup>a</sup>  | <i>Ceratocystis</i>      | 0.88±0.32 <sup>a</sup>  | 0.01±0.02 <sup>b</sup>   | 0.10±0.05 <sup>b</sup> |
| <i>Gemmatimonas</i>            | 0.72±0.29 <sup>ab</sup> | 0.60±0.21 <sup>b</sup>  | 1.17±0.17 <sup>a</sup>  | <i>Archaeorhizomyces</i> | 0.22±0.29 <sup>ab</sup> | 0.00±0.00 <sup>b</sup>   | 0.43±0.10 <sup>a</sup> |
| <i>Pseudolabrys</i>            | 0.45±0.24 <sup>b</sup>  | 1.06±0.40 <sup>a</sup>  | 0.95±0.14 <sup>ab</sup> | <i>Conlarium</i>         | 0.29±0.23 <sup>a</sup>  | 0.09±0.06 <sup>a</sup>   | 0.06±0.02 <sup>a</sup> |
| <i>Marmoricola</i>             | 0.54±0.16 <sup>a</sup>  | 1.00±0.34 <sup>a</sup>  | 0.82±0.11 <sup>a</sup>  | <i>Chaetomium</i>        | 0.04±0.03 <sup>b</sup>  | 0.05±0.03 <sup>b</sup>   | 0.36±0.12 <sup>a</sup> |
| <i>Altererythrobacter</i>      | 0.34±0.16 <sup>a</sup>  | 1.28±0.38 <sup>a</sup>  | 0.69±0.20 <sup>b</sup>  | <i>Coniochaeta</i>       | 0.00±0.00 <sup>a</sup>  | 0.26±0.44 <sup>a</sup>   | 0.01±0.01 <sup>a</sup> |
| <i>Luteimonas</i>              | 0.22±0.06 <sup>b</sup>  | 0.32±0.27 <sup>b</sup>  | 1.65±0.63 <sup>a</sup>  | <i>Trichothecium</i>     | 0.00±0.00 <sup>b</sup>  | 0.00±0.00 <sup>b</sup>   | 0.26±0.03 <sup>a</sup> |
| <i>Nitrolancea</i>             | 0.69±0.12 <sup>a</sup>  | 0.73±0.19 <sup>a</sup>  | 0.64±0.07 <sup>a</sup>  | <i>Chrysosporium</i>     | 0.06±0.05 <sup>b</sup>  | 0.00±0.00 <sup>b</sup>   | 0.19±0.07 <sup>a</sup> |
| <i>Pseudomonas</i>             | 0.45±0.09 <sup>a</sup>  | 0.93±0.46 <sup>a</sup>  | 0.64±0.36 <sup>a</sup>  | <i>Morchella</i>         | 0.12±0.20 <sup>b</sup>  | 0.00±0.00 <sup>a</sup>   | 0.10±0.05 <sup>a</sup> |
| <i>Ruminococcaceae UCG-014</i> | 0.17±0.08 <sup>a</sup>  | 0.93±0.46 <sup>a</sup>  | 0.64±0.36 <sup>a</sup>  | <i>Rhinocladiella</i>    | 0.00±0.00 <sup>b</sup>  | 0.00±0.00 <sup>b</sup>   | 0.22±0.08 <sup>a</sup> |
| MND1                           | 0.13±0.05 <sup>c</sup>  | 0.57±0.21 <sup>a</sup>  | 1.13±0.24 <sup>b</sup>  | <i>Hannaella</i>         | 0.19±0.09 <sup>a</sup>  | 0.00±0.00 <sup>b</sup>   | 0.02±0.01 <sup>b</sup> |

Data represent means ± standard error of three repeated experiments (n = 3). Different letters indicate significant differences (p < 0.05).

**Table S2.** Spearson's correlation coefficients between soil physicochemical properties

|               | <b>pH</b> | <b>SS</b> | <b>SOC</b> | <b>TN</b> | <b>TP</b> | <b>TK</b> | <b>Ava-N</b> | <b>NO3-N</b> | <b>NH4+-N</b> | <b>Ava-P</b> | <b>Ava-K</b> |
|---------------|-----------|-----------|------------|-----------|-----------|-----------|--------------|--------------|---------------|--------------|--------------|
| <b>pH</b>     |           | -0.88**   | -0.87**    | -0.83**   | 0.440     | 0.520     | -0.88**      | -0.95**      | -0.450        | 0.560        | 0.93**       |
| <b>SS</b>     | -0.88**   |           | 0.88**     | 0.82**    | -0.480    | -0.280    | 0.92**       | 0.87**       | 0.420         | -0.430       | -0.87**      |
| <b>SOC</b>    | -0.87**   | 0.88**    |            | 0.85**    | -0.400    | -0.330    | 0.93**       | 0.88**       | 0.430         | -0.530       | -0.93**      |
| <b>TN</b>     | -0.83**   | 0.82**    | 0.85**     |           | -0.450    | -0.430    | 0.83**       | 0.82**       | 0.620         | -0.68*       | -0.82**      |
| <b>TP</b>     | 0.440     | -0.480    | -0.400     | -0.450    |           | 0.67*     | -0.430       | -0.480       | -0.88**       | 0.83**       | 0.380        |
| <b>TK</b>     | 0.520     | -0.280    | -0.330     | -0.430    | 0.67*     |           | -0.480       | -0.470       | -0.630        | 0.8**        | 0.480        |
| <b>Ava-N</b>  | -0.88**   | 0.92**    | 0.93**     | 0.83**    | -0.430    | -0.480    |              | 0.85**       | 0.400         | -0.520       | -0.95**      |
| <b>NO3-N</b>  | -0.95**   | 0.87**    | 0.88**     | 0.82**    | -0.480    | -0.470    | 0.85**       |              | 0.500         | -0.600       | -0.85**      |
| <b>NH4+-N</b> | -0.450    | 0.420     | 0.430      | 0.620     | -0.88**   | -0.630    | 0.400        | 0.500        |               | -0.9**       | -0.400       |
| <b>Ava-P</b>  | 0.560     | -0.430    | -0.530     | -0.68*    | 0.83**    | 0.8**     | -0.520       | -0.600       | -0.9**        |              | 0.500        |
| <b>Ava-K</b>  | 0.93**    | -0.87**   | -0.93**    | -0.82**   | 0.380     | 0.480     | -0.95**      | -0.85**      | -0.400        | 0.500        |              |

Significance levels of one-way ANOVA: \*\*, P < 0.01; \*, P < 0.05; ns, not significant
